# Supplementary material
Source: Springer Nature journal article supplement (https://www.springermedizin.de/resource/supplementary/12995_2012_239_MOESM5_ESM.pdf/9622974)

Length of service groups: ○ 0-7 years (n=12) ● 8-15 years (n=10) ● >15 years (n=8)

Frequency, Hz

*m. extensor digitorum*

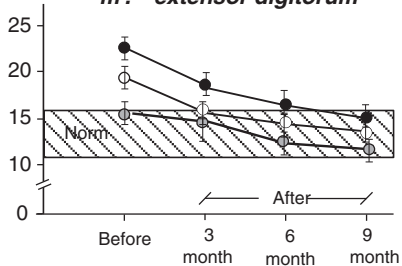

*m. tibialis anterior*

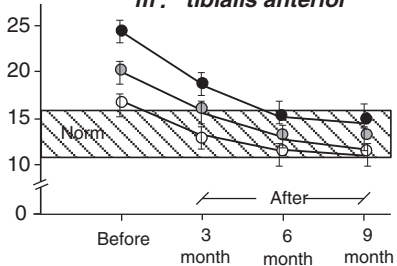

*m. gastrocnemius*

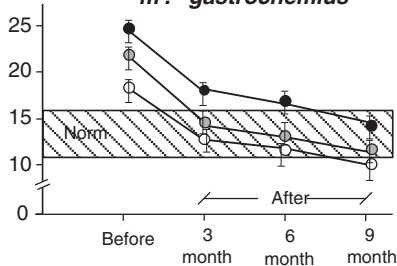

Supplement: MOESM5 [file 9622974]
